# Supplementary material for: New Perspectives on Microbial Community Distortion after Whole-Genome Amplification
Source: PubMed Central journal article supplement (PMC4444113; doi:10.1371/journal.pone.0124158), 2015-05-26

### Distributions for kingdom level

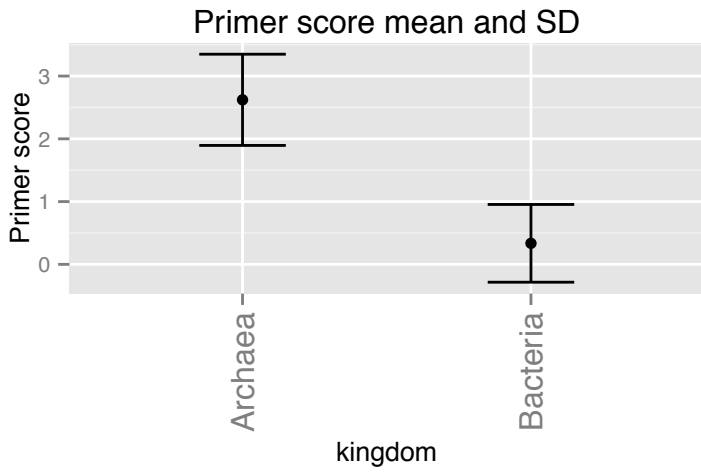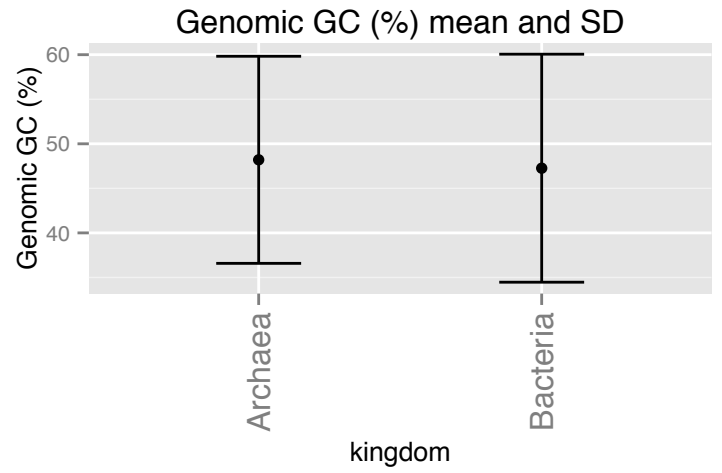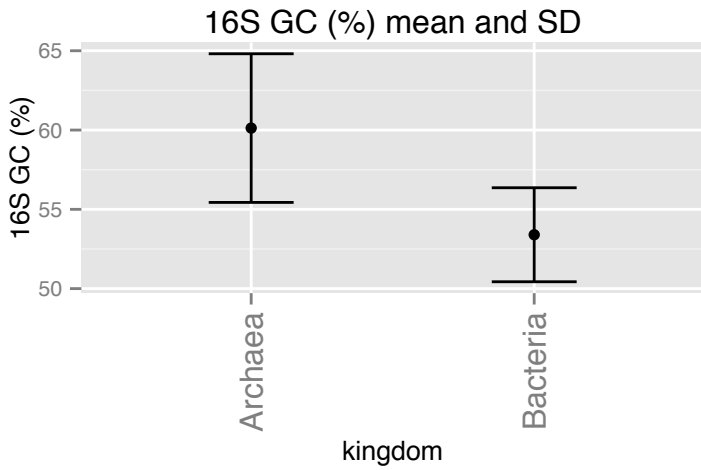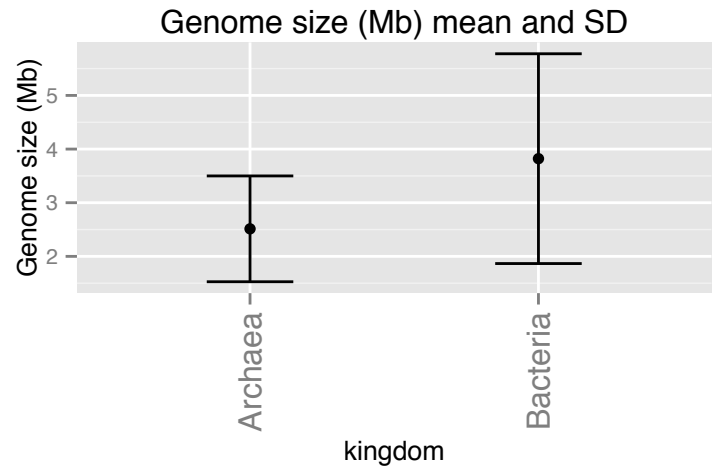

## Distributions for phylum level

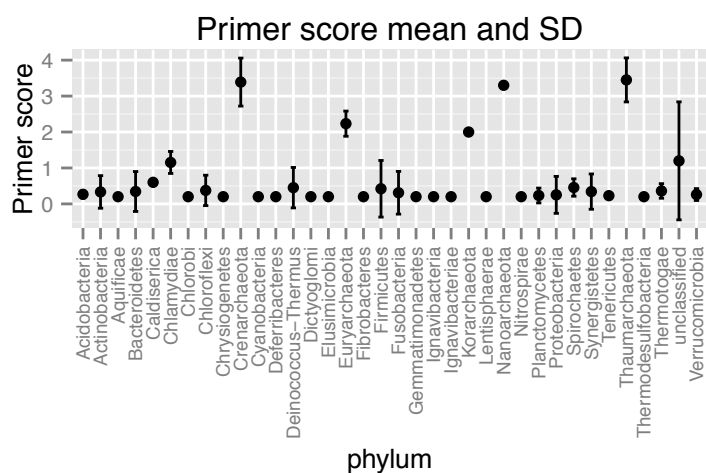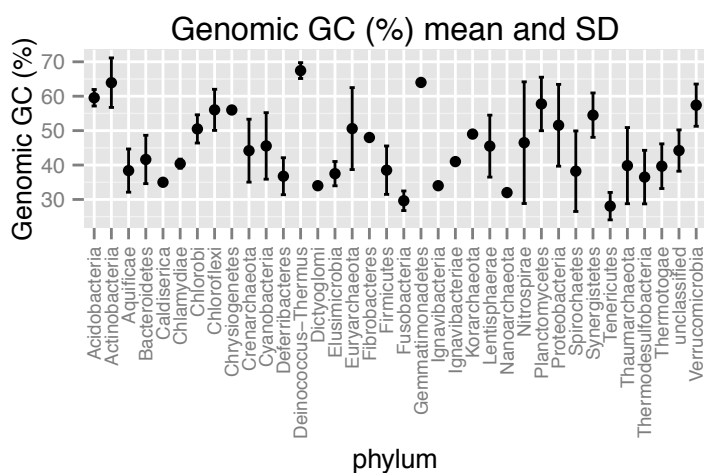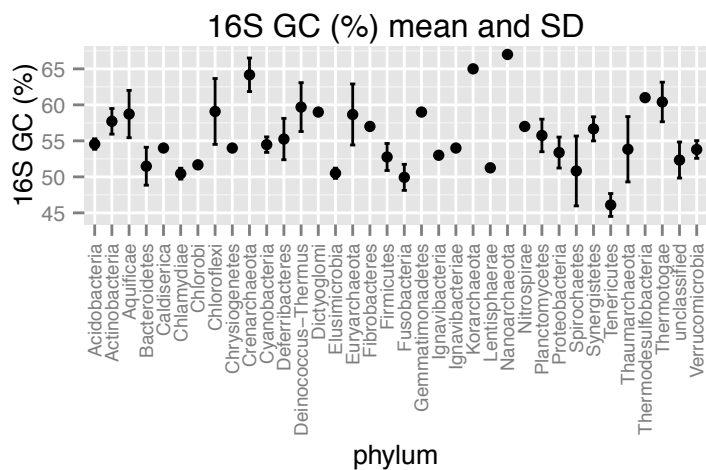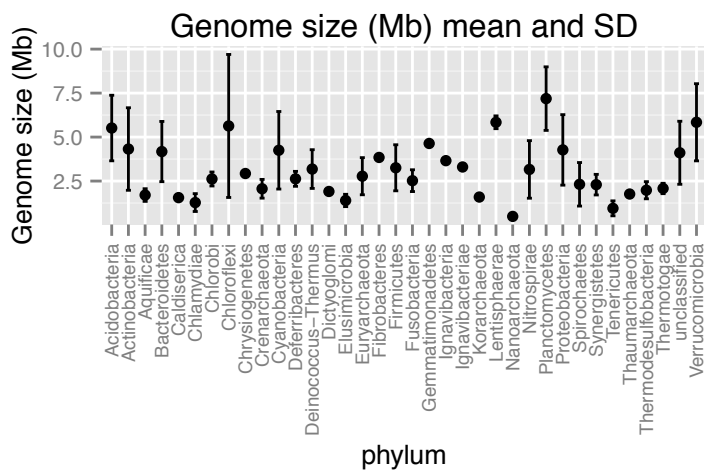

## Distributions for class level

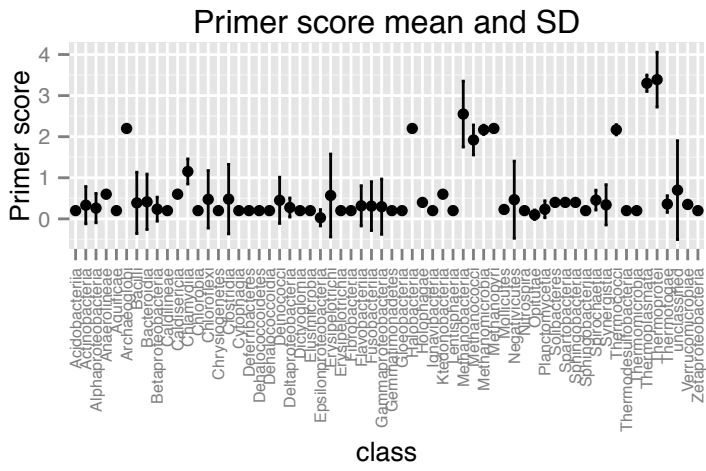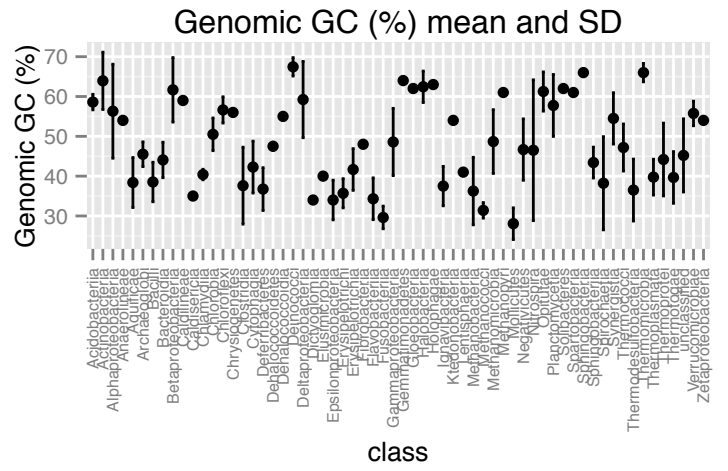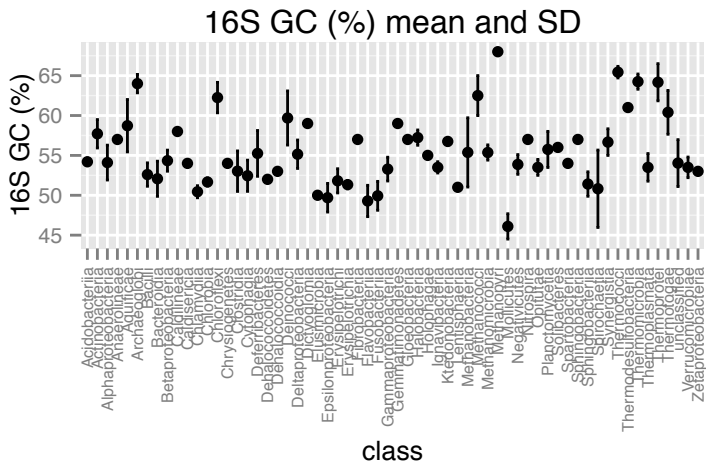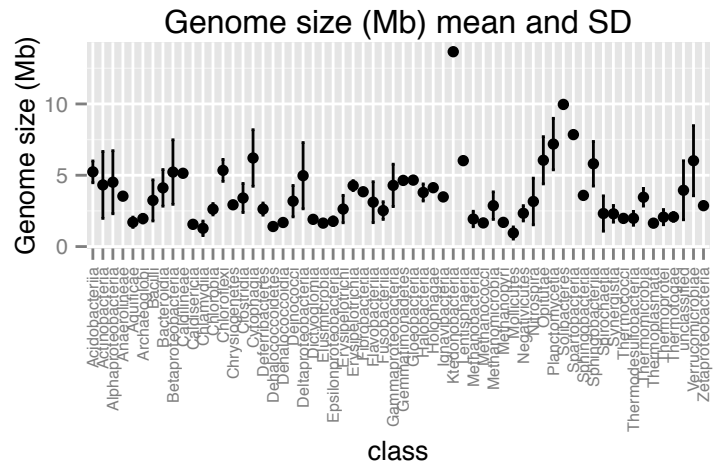

## Distributions for order level

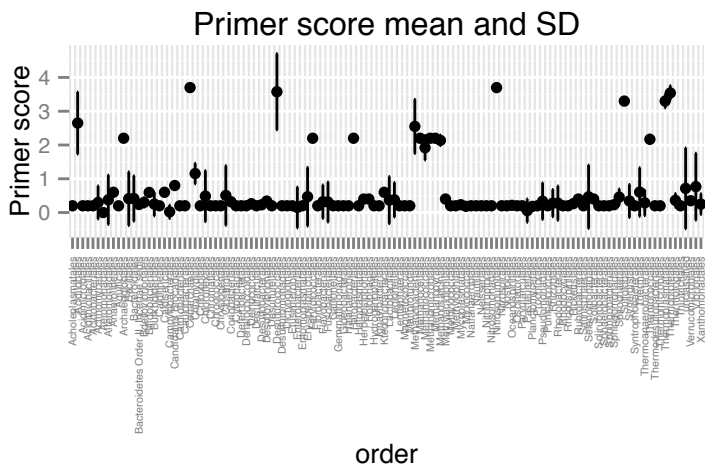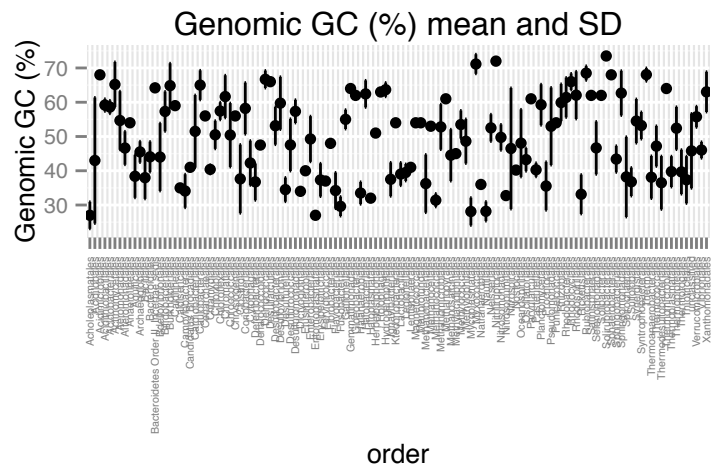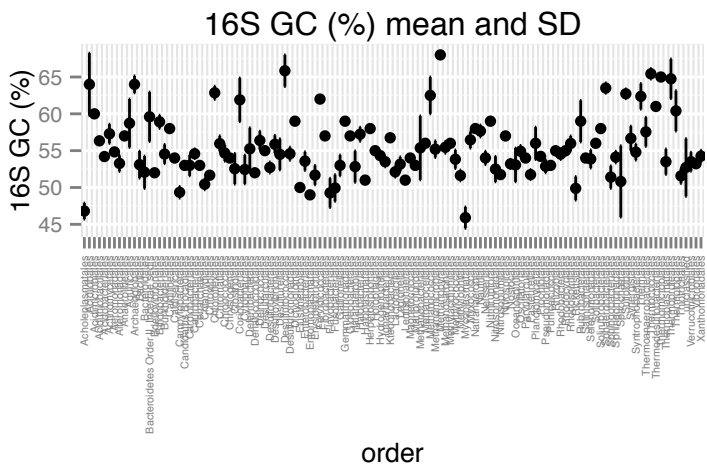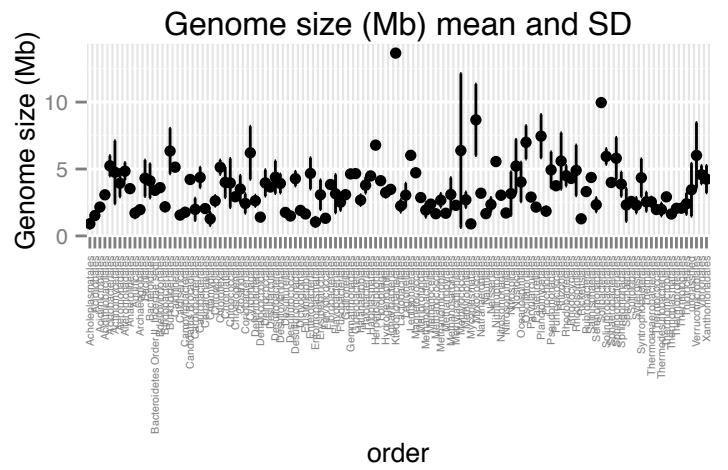

## Distributions for family level

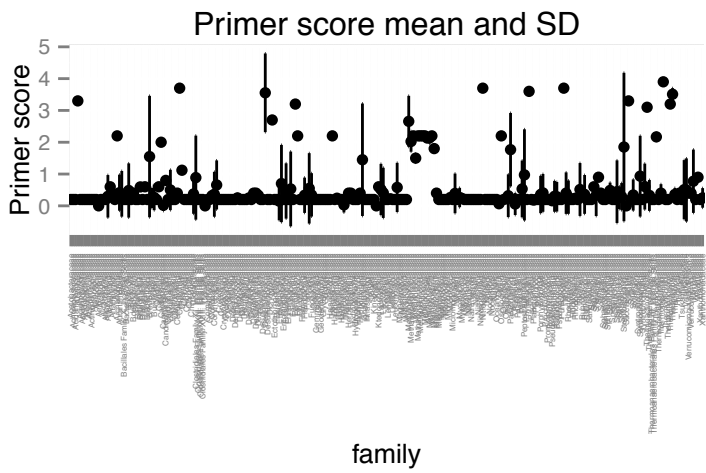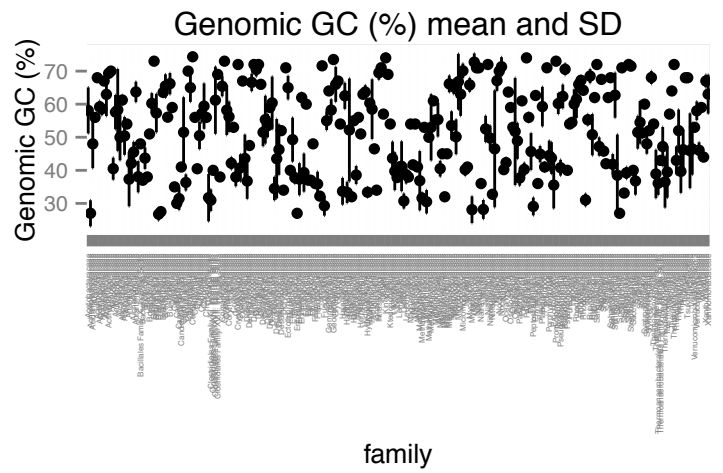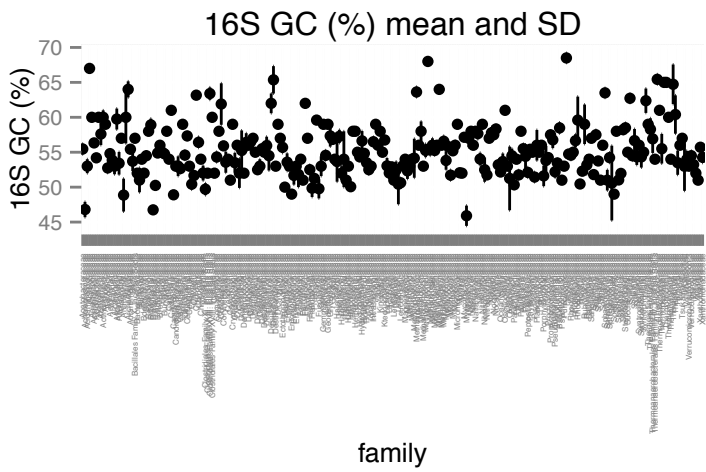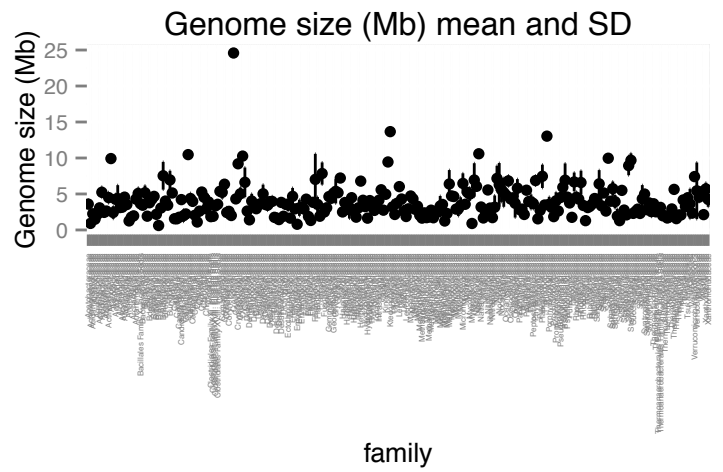

Distributions for genus level

Primer score mean and SD

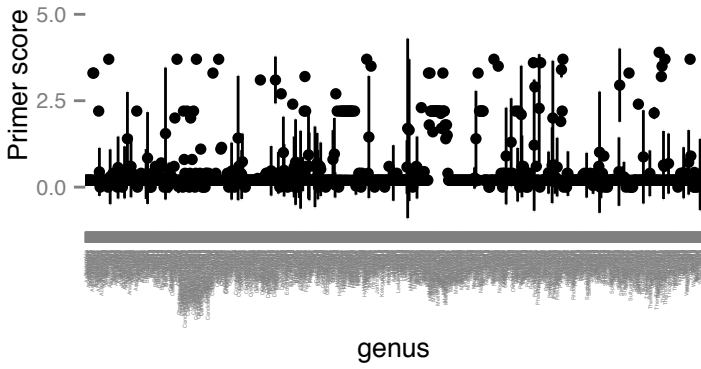

Genomic GC (%) mean and SD

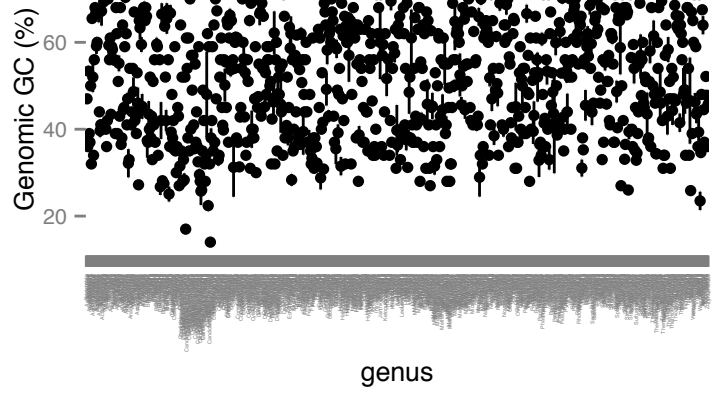

16S GC (%) mean and SD

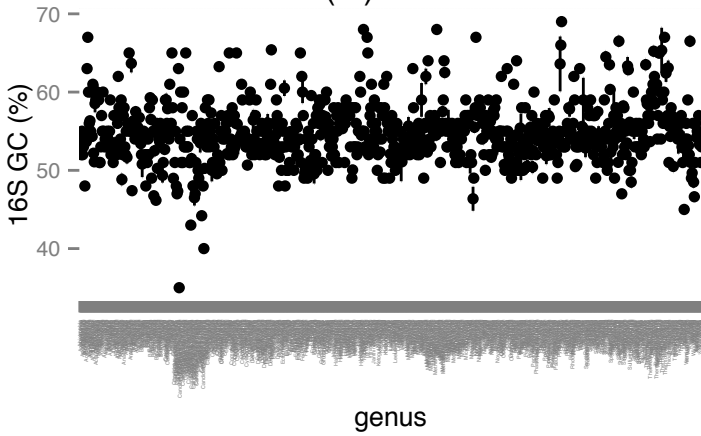

Genome size (Mb) mean and SD

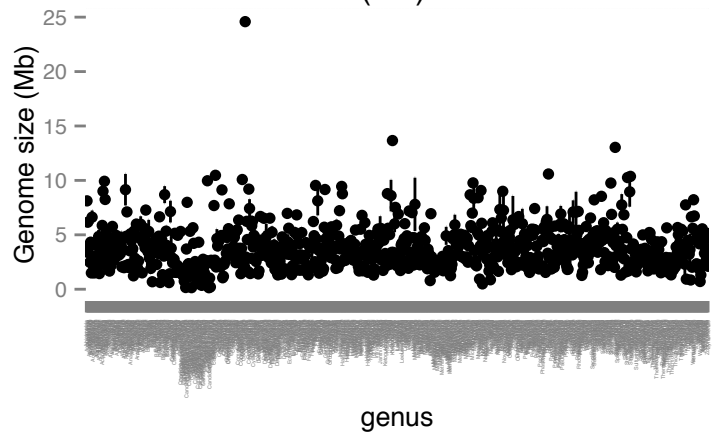

Distributions for species level

Primer score mean and SD

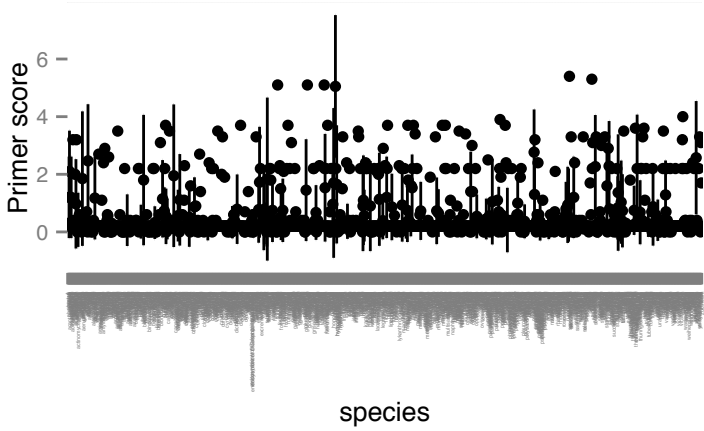

Genomic GC (%) mean and SD

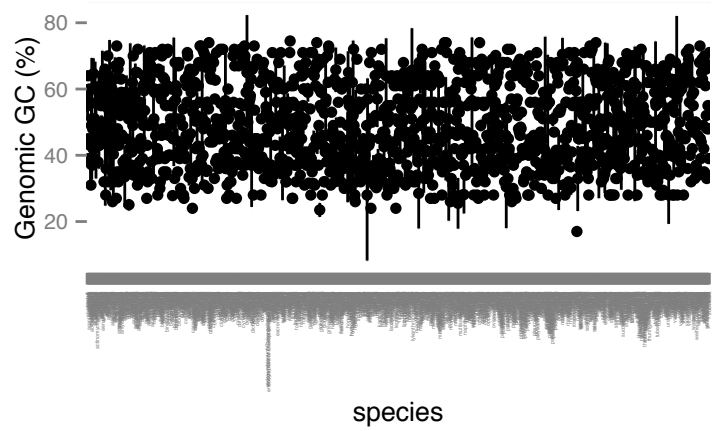

16S GC (%) mean and SD

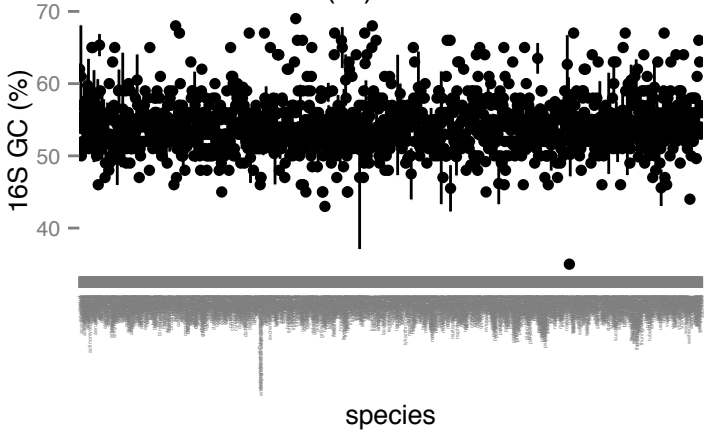

Genome size (Mb) mean and SD

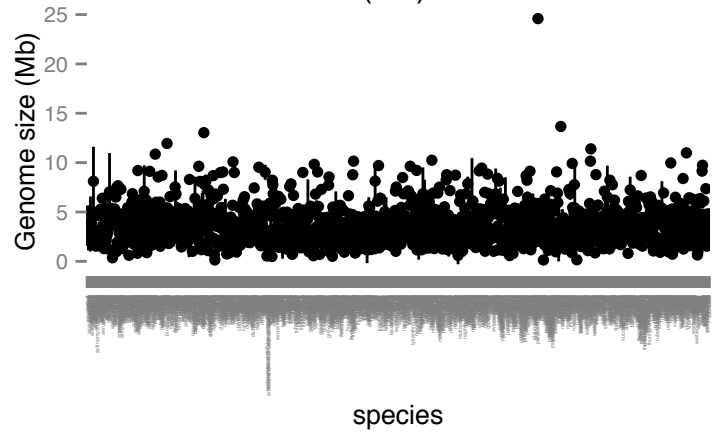

Supplement: pone.0124158.s002.pdf [file pone.0124158.s002.pdf]
