# Supplementary material for: New Perspectives on Microbial Community Distortion after Whole-Genome Amplification
Source: PubMed Central journal article supplement (PMC4444113; doi:10.1371/journal.pone.0124158), 2015-05-26

## C - groundwater

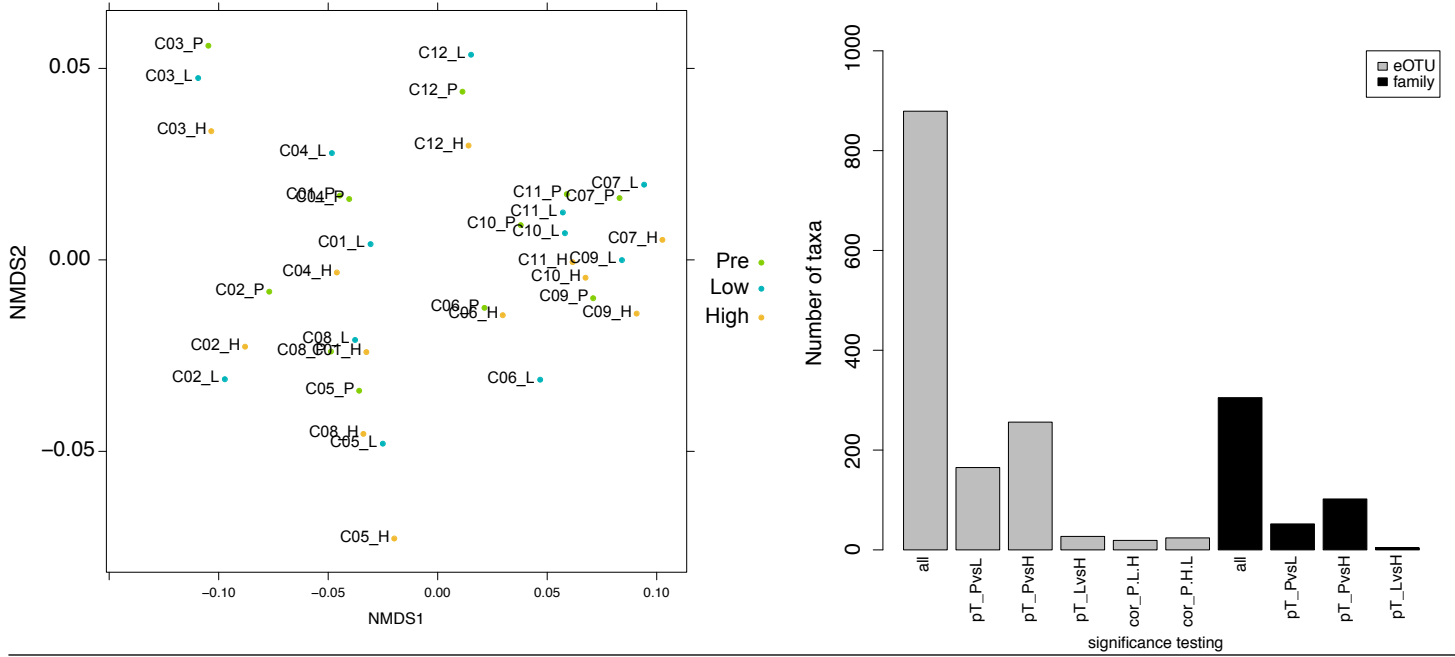

## D - drinking water

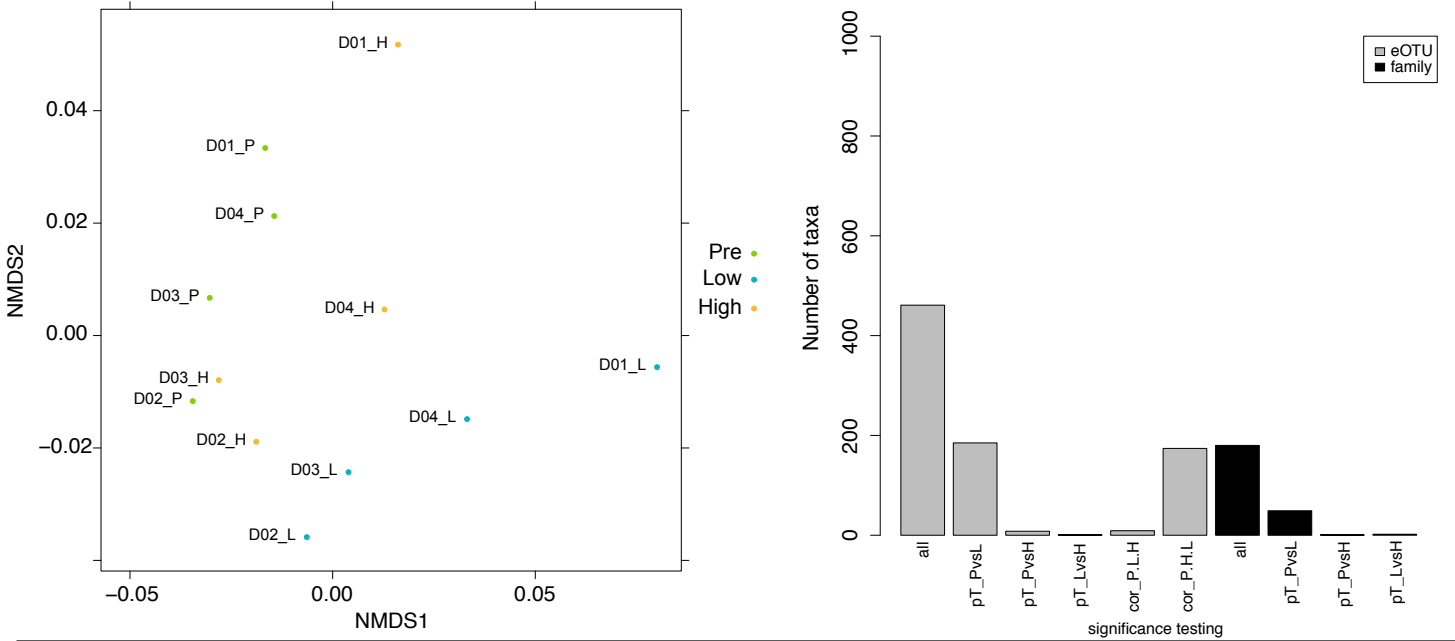

## T - treated biosolid

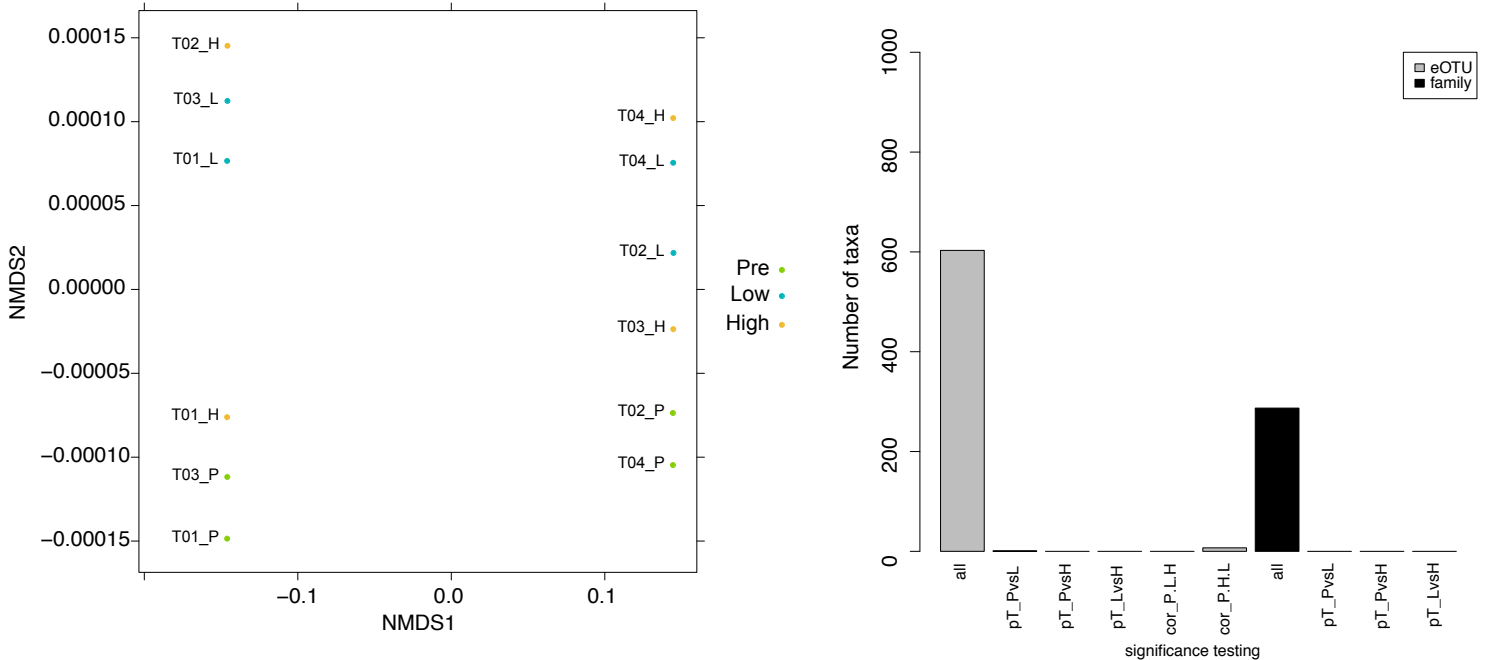

Supplement: pone.0124158.s001.pdf [file pone.0124158.s001.pdf]
