# Supplementary material for: New Perspectives on Microbial Community Distortion after Whole-Genome Amplification
Source: PubMed Central journal article supplement (PMC4444113; doi:10.1371/journal.pone.0124158), 2015-05-26
Supplement: pone.0124158.s003.pdf [file pone.0124158.s003.pdf]

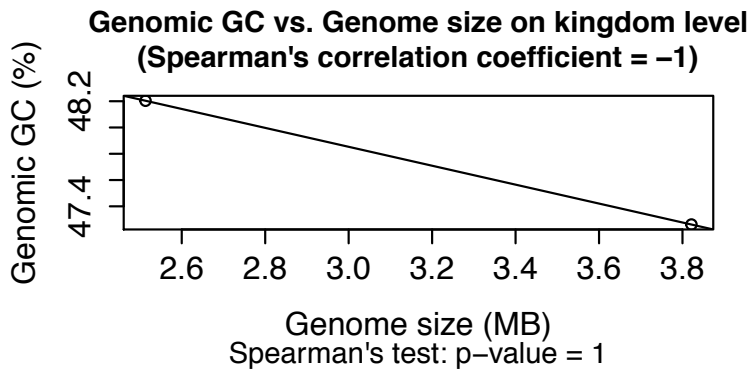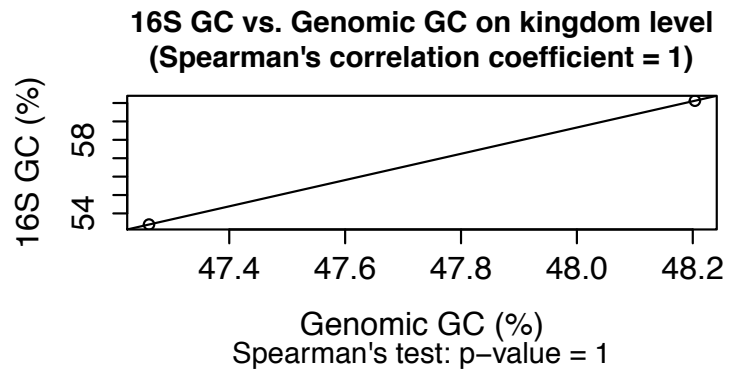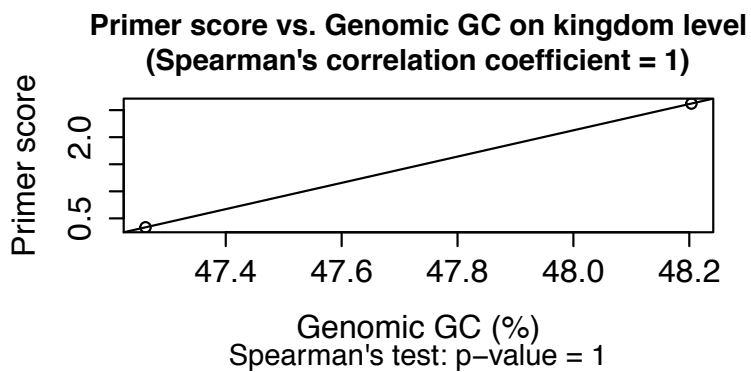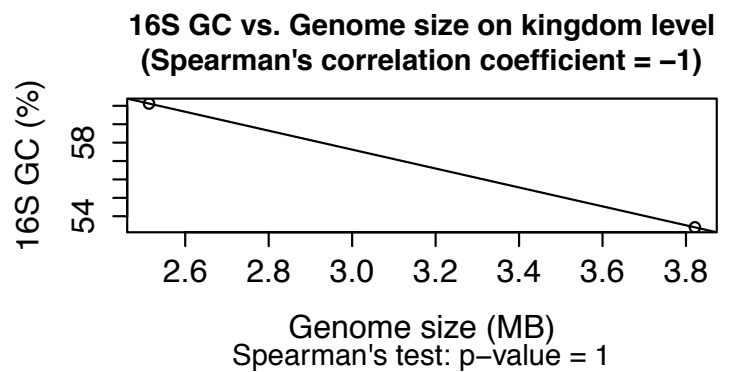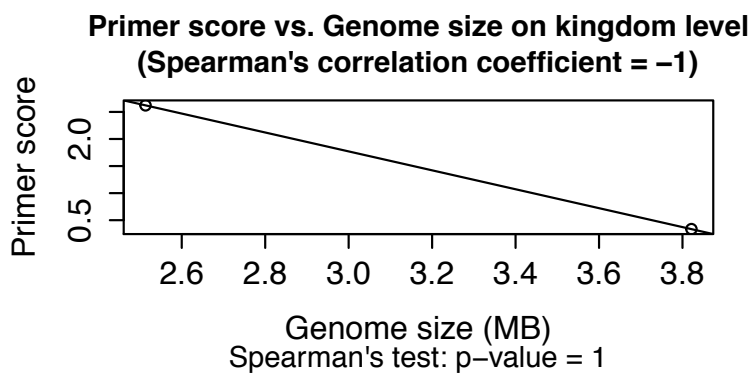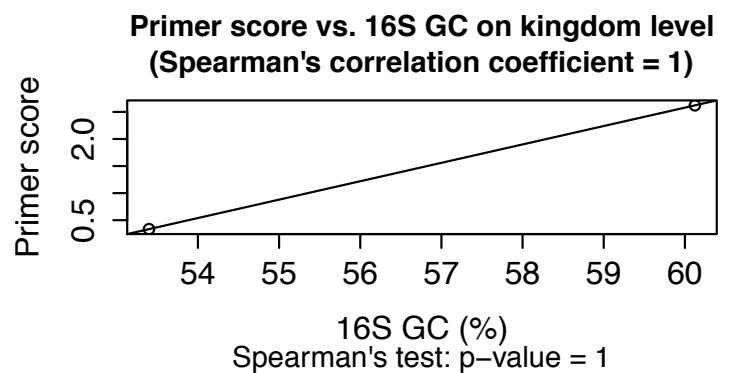

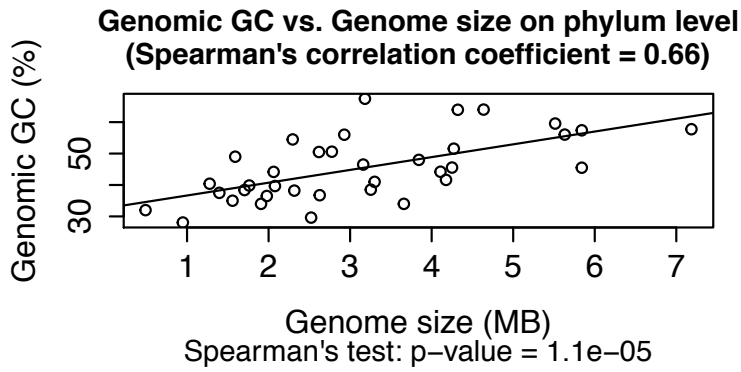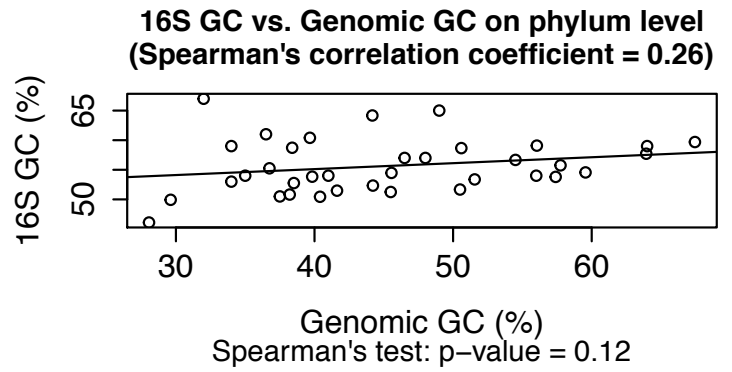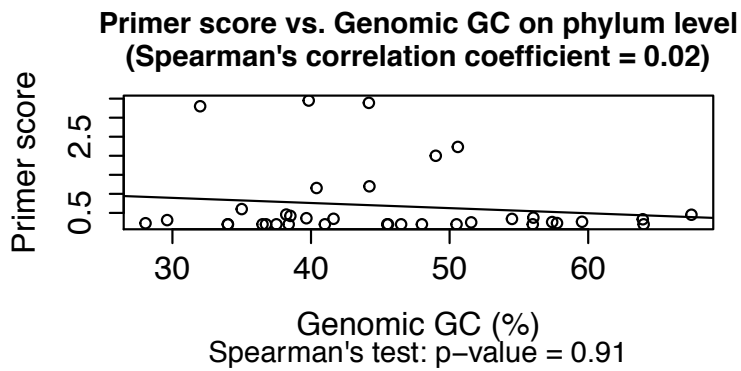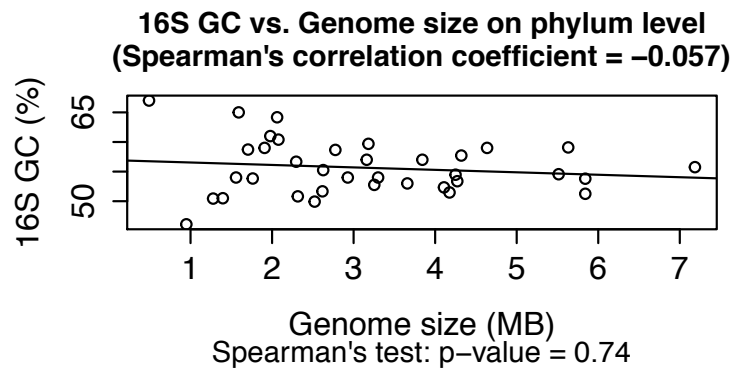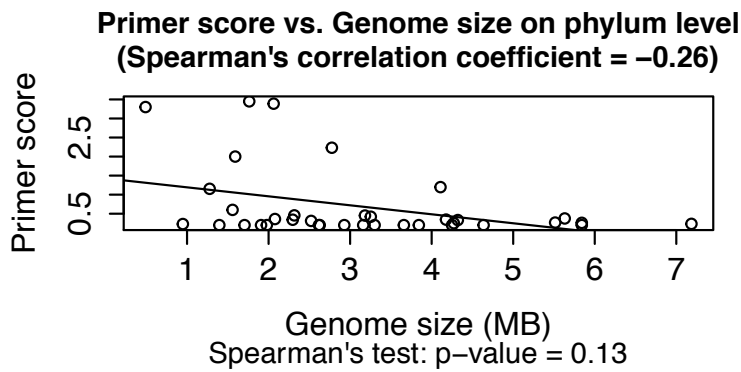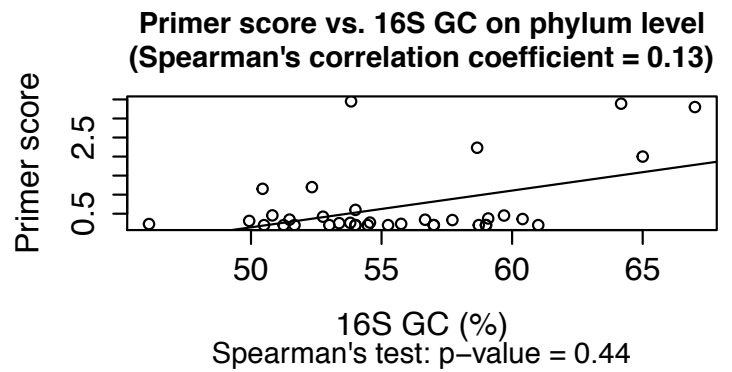

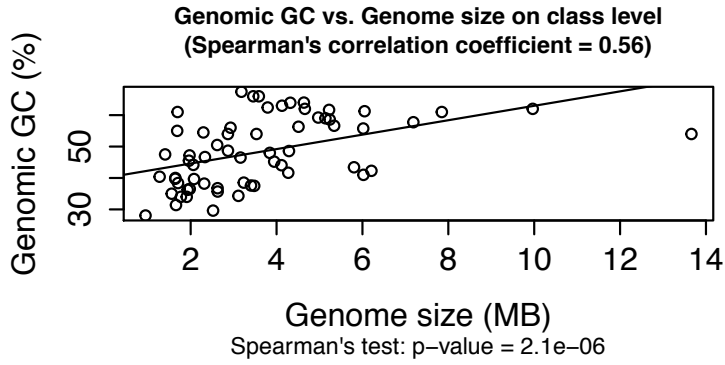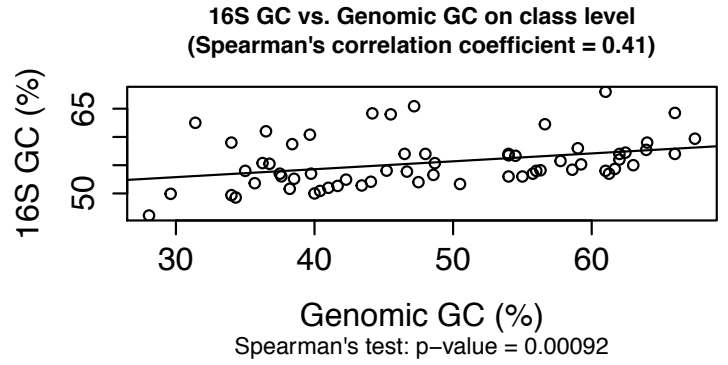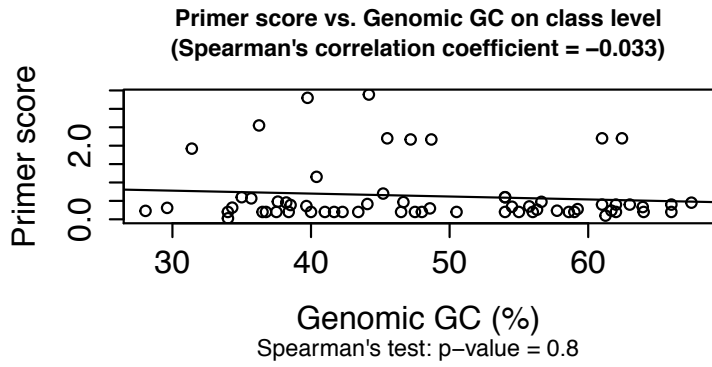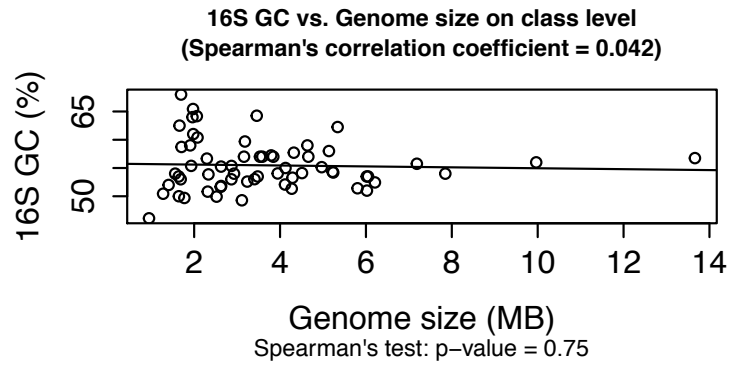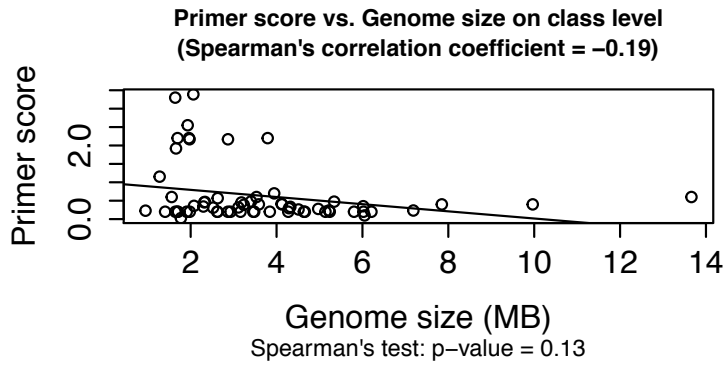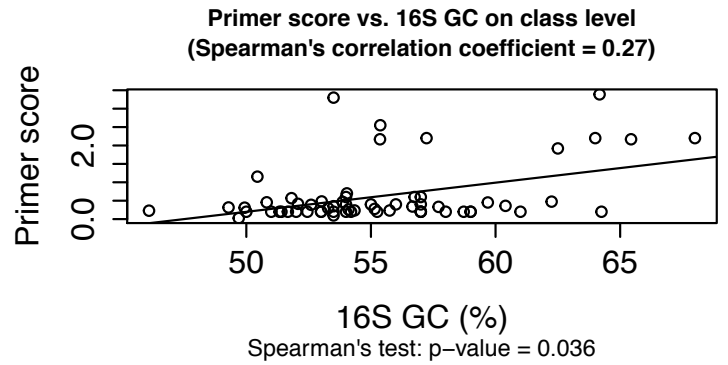

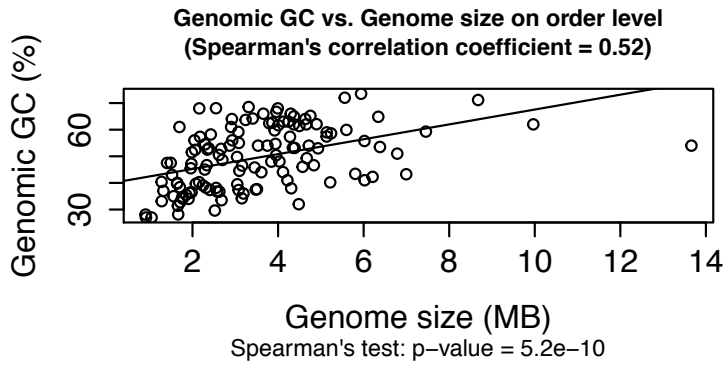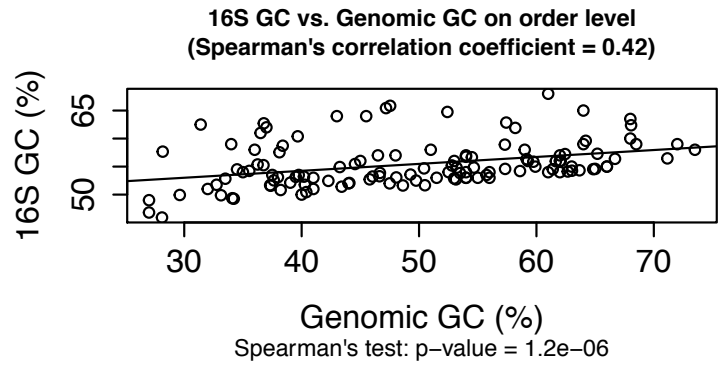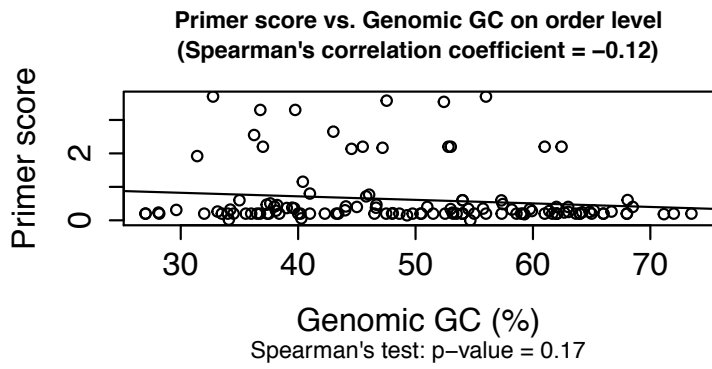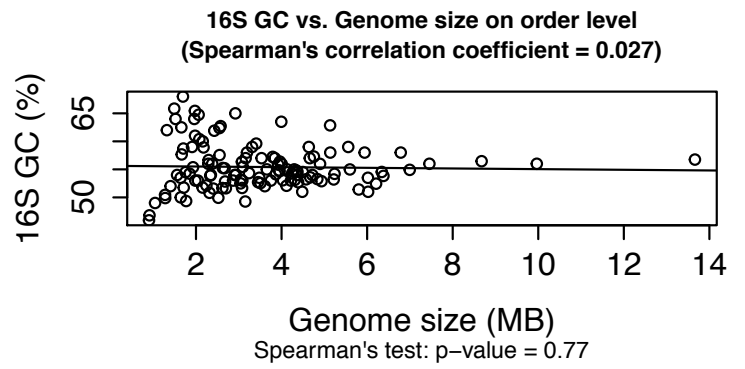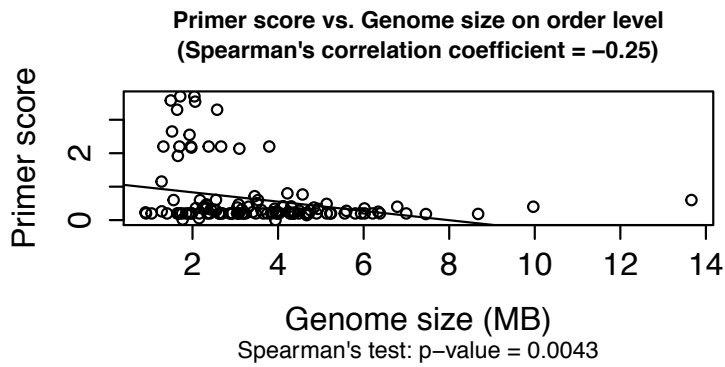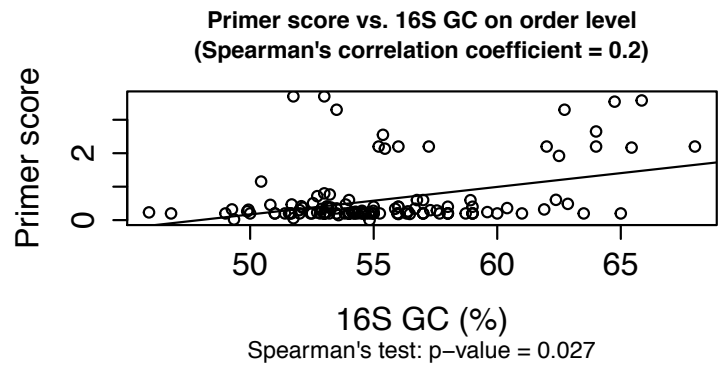

**Genomic GC vs. Genome size on family level**  
(Spearman's correlation coefficient = 0.57)

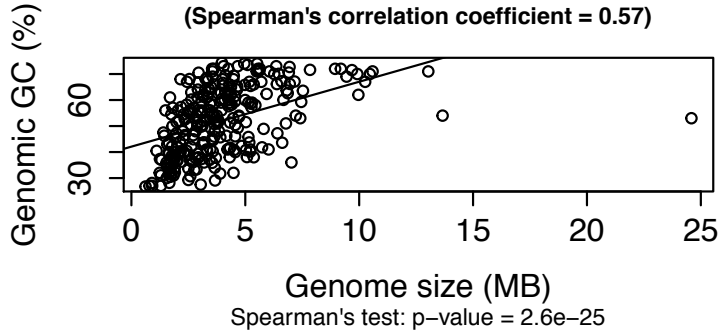

**16S GC vs. Genomic GC on family level**  
(Spearman's correlation coefficient = 0.56)

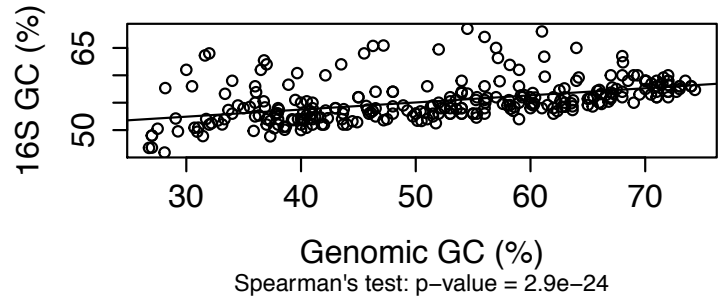

**Primer score vs. Genomic GC on family level**  
(Spearman's correlation coefficient = -0.18)

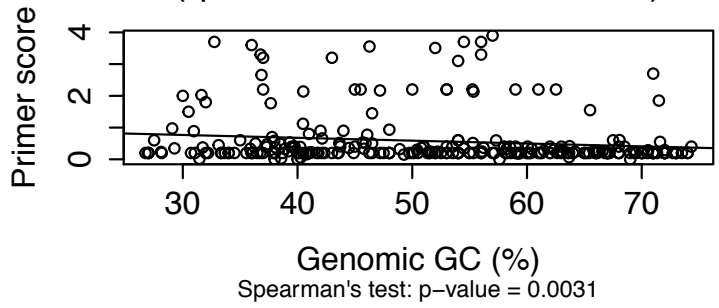

**16S GC vs. Genome size on family level**  
(Spearman's correlation coefficient = 0.14)

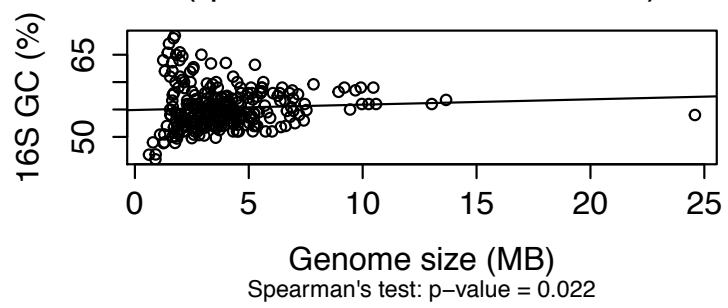

**Primer score vs. Genome size on family level**  
(Spearman's correlation coefficient = -0.3)

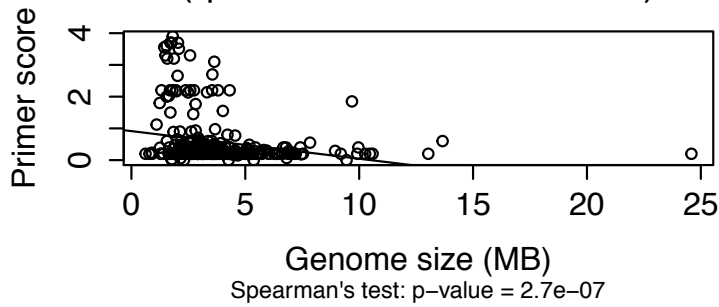

**Primer score vs. 16S GC on family level**  
(Spearman's correlation coefficient = 0.085)

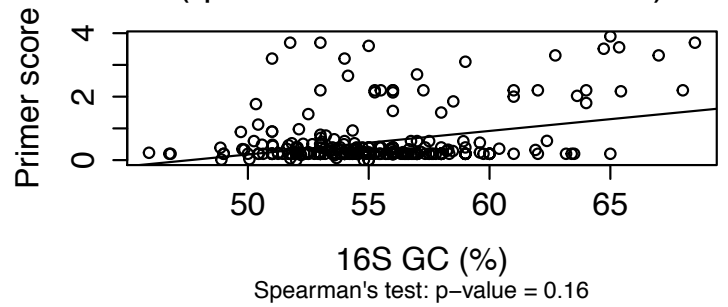

**Genomic GC vs. Genome size on genus level**  
(Spearman's correlation coefficient = 0.5)

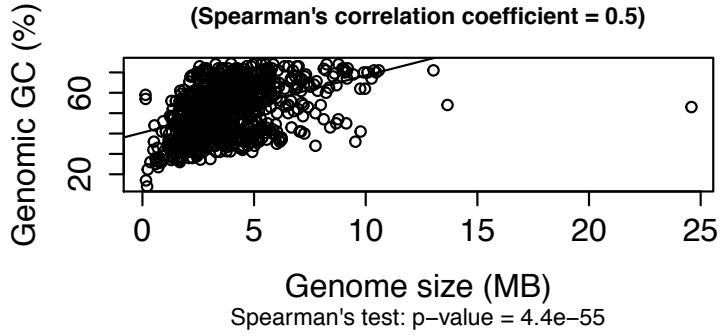

**16S GC vs. Genomic GC on genus level**  
(Spearman's correlation coefficient = 0.58)

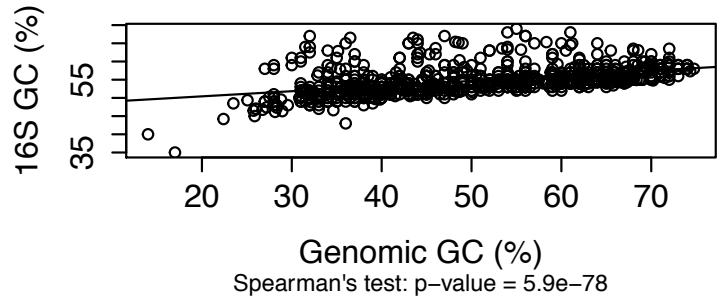

**Primer score vs. Genomic GC on genus level**  
(Spearman's correlation coefficient = -0.053)

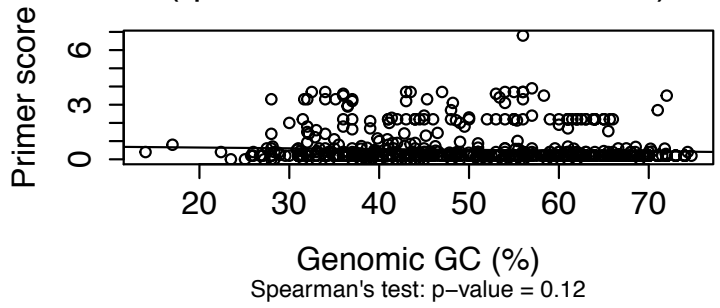

**16S GC vs. Genome size on genus level**  
(Spearman's correlation coefficient = 0.14)

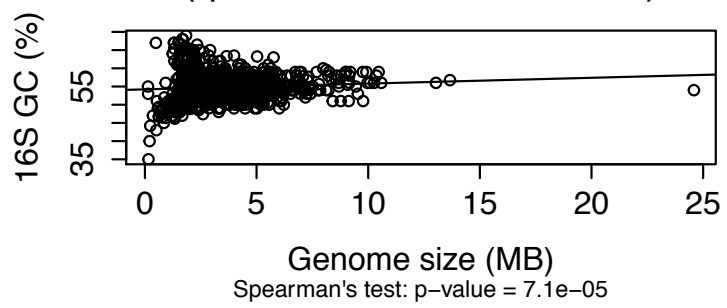

**Primer score vs. Genome size on genus level**  
(Spearman's correlation coefficient = -0.23)

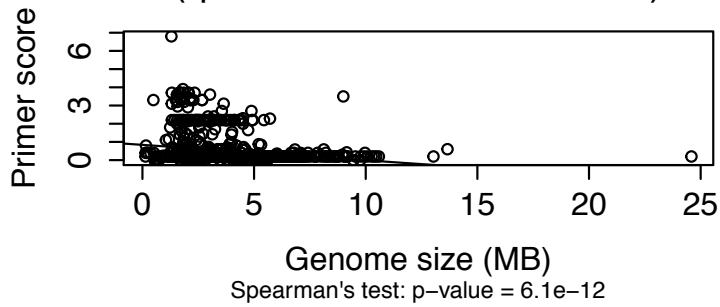

**Primer score vs. 16S GC on genus level**  
(Spearman's correlation coefficient = 0.21)

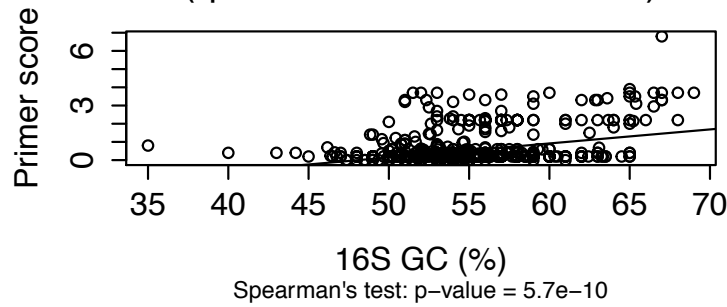

**Genomic GC vs. Genome size on species level**  
(Spearman's correlation coefficient = 0.53)

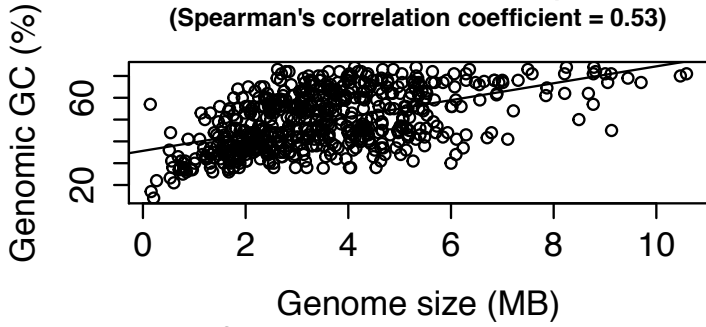

Spearman's test: p-value =  $1.2e-44$

**16S GC vs. Genomic GC on species level**  
(Spearman's correlation coefficient = 0.59)

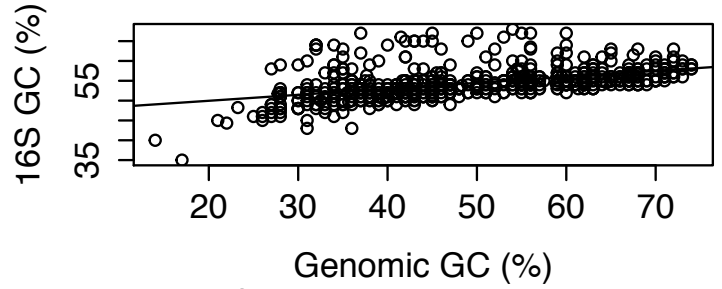

Spearman's test: p-value =  $8e-59$

**Primer score vs. Genomic GC on species level**  
(Spearman's correlation coefficient = 0.0039)

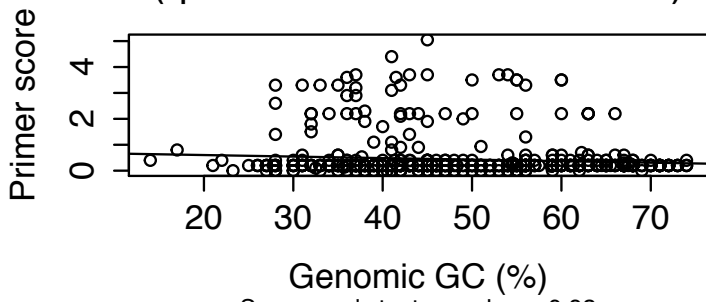

Spearman's test: p-value = 0.92

**16S GC vs. Genome size on species level**  
(Spearman's correlation coefficient = 0.21)

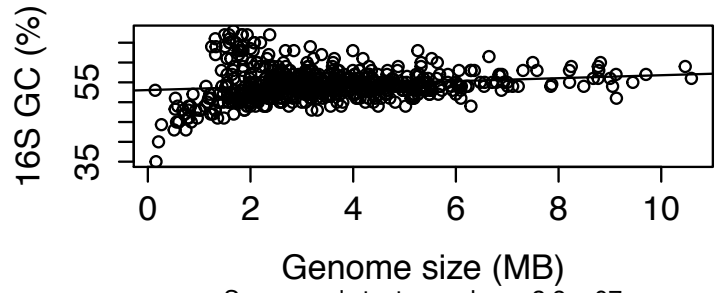

Spearman's test: p-value =  $2.8e-07$

**Primer score vs. Genome size on species level**  
(Spearman's correlation coefficient = -0.21)

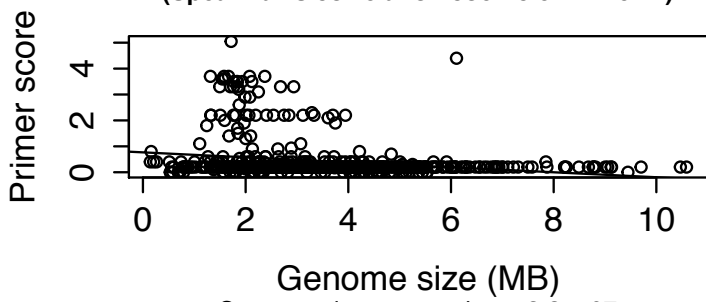

Spearman's test: p-value =  $3.2e-07$

**Primer score vs. 16S GC on species level**  
(Spearman's correlation coefficient = 0.27)

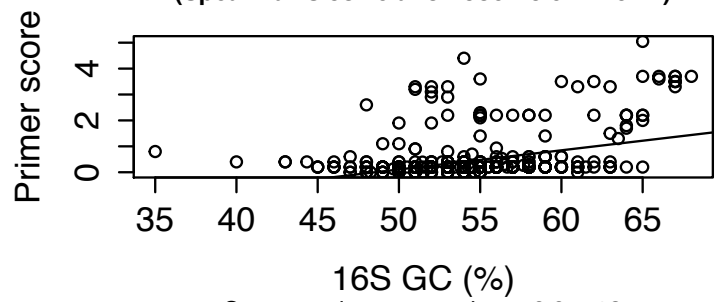

Spearman's test: p-value =  $6.9e-12$
